# Supplementary material for: Late autumn aerosol trace element composition and source tracking over the Southern Mozambique channel
Source: Copernicus journal article supplement (doi:10.5194/egusphere-2025-4962), 2025-11-24
Supplement: Supplementary file [file egusphere-2025-4962-RC1-supplement.pdf]

# Late autumn aerosol trace element composition and source tracking over the Southern Mozambique channel

Morgane M.G. Perron<sup>1</sup>, Eva Bucciarelli<sup>1</sup>, Hélène Planquette<sup>1</sup>, Thomas Holmes<sup>2</sup>, Saumik Samanta<sup>3,4</sup>, Yoan Germain<sup>5</sup>, Alakendra Roychoudhury<sup>4</sup>, Géraldine Sarthou<sup>1</sup>.

- 5 <sup>1</sup> Univ Brest, CNRS, IFREMER, IRD, LEMAR, IUEM, F-29280 Plouzané, France  
<sup>2</sup> Australian Antarctic Program Partnership (AAPP), University of Tasmania, Battery Point, Tasmania, Australia  
<sup>3</sup> School of Geosciences, University of the Witwatersrand, Johannesburg, South Africa  
<sup>4</sup> Department of Earth Sciences, Stellenbosch University, Stellenbosch, South Africa  
<sup>5</sup> IFREMER, CNRS, Univ Brest, UBS, UMR6538, Laboratoire Geo-Ocean, F-29280 Plouzané, France

10 Correspondence to: Morgane M. G. Perron (morgane.perron@univ-brest.fr)

## Abstract.

The southern Mozambique Channel (20-30° S) receives a range of atmospheric influences, from desert dust and fire emissions through to industrial, mining and agricultural emissions, emitted from both Madagascar and southeastern Africa. Our study characterises the trace element composition of aerosols collected between the south of Madagascar and Durban, South Africa during the low dust season. Dust deposition fluxes (40-263 mg m<sup>-2</sup> yr<sup>-1</sup>), calculated based on Al measurement in aerosols, fell within the lower range of modelled fluxes estimates, confirming the absence of major dust or fire events during the study. While prevailing air-masses affecting our samples were modelled to originate from long-range particulate transport over the Southern Ocean, a holistic understanding of our sample composition could only be obtained when accounting for sporadic aeolian inputs from the two local landmasses. Notably, we found surprising high levels of Cr (4±2 ng m<sup>-3</sup>) and Cd (0.02±0.01 ng m<sup>-3</sup>) in the atmosphere over the southern Channel which could be, at least in part, attributed to emissions from mining (chromite and gold, respectively) and smelting activities (Cu, Zn and Cd co-emission) on both neighbouring landmasses. Our results emphasise the difficulty to track such specific and overlooked atmospheric sources in the absence of known atmospheric tracers. We also stress the need for multi-elemental studies and encourage the use of detailed (cluster) air-mass transport model analysis in regions dominated by the long-range atmospheric transport as complex atmospheric circulation and minor (sporadic) inputs from terrestrial air-masses may have disproportionate impact on the atmospheric composition.

## 1 Introduction

Atmospheric transport and deposition of trace elements play a key role in shaping marine biogeochemical cycles. In particular, iron (Fe) delivered via dust inputs can stimulate primary productivity in nutrient-limited oceanic regions, thereby modulating the marine carbon cycle (Mendez et al., 2010). Conversely, aeolian deposition can also introduce potentially toxic elements such as

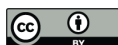

35 cadmium (Cd), copper (Cu), lead (Pb) and zinc (Zn), emitted from urban and industrial areas, which can  
 be deleterious for coastal marine ecosystems (Paytan et al., 2009; Thiagarajan et al., 2024; Zhou et al.,  
 2021). Determining the relative contribution of these various sources, as well as their chemical  
 composition is thus essential to assess their ecological impact.

The southern Mozambique Channel (defined between 20° S-30° S in this study) lies between two  
 40 landmasses, namely the island of Madagascar to the east and the southeastern coast of Africa (including,  
 South Africa and Mozambique) to the west. Both landmasses are characterised by arid to semi-arid  
 landscapes which are increasingly prone to droughts (Barimalala et al., 2024; Mahlalela et al., 2020;  
 Rigden et al., 2024) and wildfires (Frappier-Brinton and Lehman, 2022; Richardson et al., 2022). The  
 dry season runs from May to October and corresponds to the most favourable period for dust  
 45 entrainment into the atmosphere and long-range transport towards open ocean areas (Bhattachan et al.,  
 2012; Ginoux et al., 2012).

Earth system models and satellite observations consistently identify the Namib Desert, the Etosha basin  
 in Namibia and the Kalahari Desert in Botswana (Bhattachan et al., 2015) as major dust sources in  
 Southern Africa. Seasonally, these sources contribute significantly to dust deposition across sub-tropical  
 50 (25° S-40° S) latitudes of the southwest Indian Ocean (Gili et al., 2022; Jickells et al., 2005; Li et al.,  
 2008a). In addition, during the dry season, savannah fires in southern Africa emit large plumes of  
 nutrient-rich smoke, forming a “river of smoke” that can extend eastwards across the Mozambique  
 Channel and even reach western Australia (Ranaivombola et al., 2025). Recently, southern Africa iron-  
 rich dust has been linked to the formation of unusually large phytoplankton blooms in the southern  
 55 Mozambique Channel south of Madagascar (Gittings et al. 2024). More locally, aeolian transport from  
 Madagascar has also been demonstrated to carry smoke over the Mozambique Channel during the dry  
 season (Kumar et al., 2014).

From the 21<sup>st</sup> century on, intensification of land use, including agriculture, mining, transport and  
 urbanization, has resulted in the doubling of dust emissions from southern Africa and Madagascar  
 60 Island (Hooper and Marx, 2018). In addition, to sustain the energy sectors, southern African countries  
 are highly dependent on coal, the combustion of which contributes massive **quantity** of airborne  
 particulates (Mirzania et al., 2023). Many of such thermal power plant sources, located on the east coast  
 of South Africa, showed a four to five folds rise in particulate matter emissions over the last decade  
 owing to the increased demand of power generation (Morosele and Langerman, 2020; Zerizghi et al.,  
 65 2022). Similarly, both southern African countries and Madagascar have also recently experienced a  
 steep increase in vehicle numbers, enhancing the vehicular and road emissions (Department of  
 Transport, 2017; Iimi, 2023).

These anthropogenic activities emit not only nutrients but also toxic trace metals. Their finer particle  
 size and emission processes can result in greater solubility upon deposition, making them potentially  
 70 more bio-accessible (or more toxic) to micro-organisms than mineral dust (Sholkovitz et al., 2009).  
 Mining and industrial hotspots, in the Highveld region of South Africa and near the cities of Richards  
 Bay and Durban (South Africa) and Maputo (Mozambique) further contribute to the atmospheric burden  
 of trace metals in the region.

Despite the diversity and intensity of surrounding natural and anthropogenic aeolian sources, no study  
 75 to date has characterized the chemical composition of aerosols over the southern Mozambique Channel.  
 Here, we present the first analysis of the atmospheric composition of trace elements, including

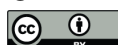

aluminium (Al), cadmium (Cd), chromium (Cr), copper (Cu), iron (Fe), nickel (Ni), lead (Pb), titanium (Ti), vanadium (V), and zinc (Zn), based on aerosol samples collected during the late austral autumn (April-May) 2022 over the southern Mozambique Channel. Our objective is to provide an initial  
 80 assessment of the chemical variability and source signatures of atmospheric inputs to this understudied marine system.

## 2 Materials and Methods

### 2.1 Aerosol collection during the RESILIENCE campaign

85 The RESILIENCE (fRonts, EddieS and marIne Life in the wEstern iNdian oCEan) campaign took place aboard the R/V Marion Dufresne II in the austral autumn 2022 with the aim to better understand small scale oceanic interactions between physics and biology within Mozambique Channel eddies and rings (Penven et al., 2025; TERNON et al., 2022). The cruise departed Reunion Island on the 19<sup>th</sup> of April 2022 to explore the central Mozambique Channel and sail along the southeast coast of South Africa to arrive  
 90 in Durban on the 3<sup>rd</sup> of May 2022.

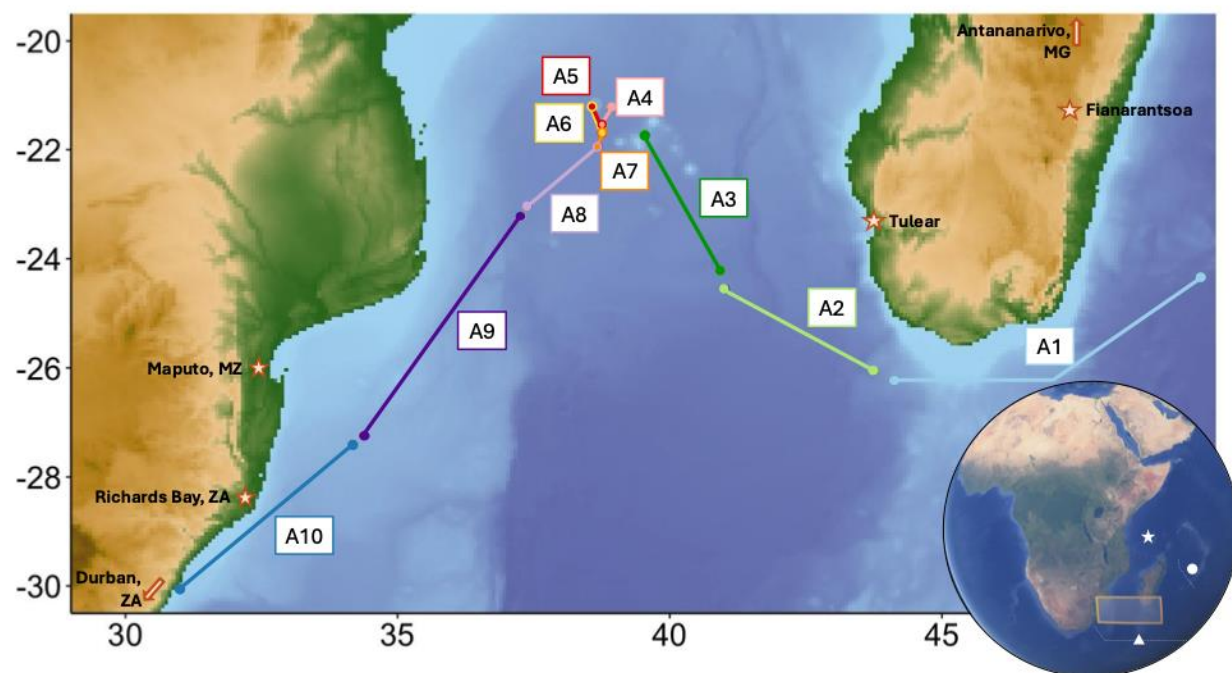

95 **Figure 1.** Location of the 10 aerosol samples, numbered A1 to A10, collected during the RESILIENCE cruise in the Southern Mozambique Channel. The inset world map indicates the location of this study (yellow rectangle) together with the location of previous field studies (symbols) reporting atmospheric trace element concentrations in the direct vicinity of our study region (triangle: Witt et al. (2006), circle: Witt et al. (2010), star: Chester et al. (1991)).

Collection of atmospheric total suspended particles was undertaken using acid-cleaned Whatman 41 filters (Cutter et al., 2017; Morton et al., 2013) and a high-volume air sampler (TE-5170, Tisch Environmental, flow rate: 1.08m<sup>3</sup>/min). The aerosol sampler, installed on the upper viewing deck of the

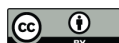

100 ship, roughly 18 m above the sea level, enabled the collection of ten 47 mm filters simultaneously.  
 Sampling was only undertaken when the ship was underway and under front winds (290° - 70° relative  
 to the ship's position) to prevent contamination from the ship's smokestack. Filter holder preparation  
 and retrieval were undertaken under a laminar flow hood placed inside a "clean bubble" laboratory in  
 the ship. Filters were collected every 24 hours, placed in clean petri dishes using plastic tweezers and  
 105 stored frozen in double sealed bags until further analysis in the land-based laboratory. Two filter blank  
 samples, consisting of acid washed Whatman 41 which were not brought to the field, were used for  
 blank correction as described in section 2.2. The indicative location of aerosol sampling transects is  
 displayed in Figure 1 and the supplementary material Table S1 provides a log-sheet of all 10 aerosol  
 samples collected, including collection dates and associated ship's coordinates.

## 110 2.2 Aerosol trace element analysis

Laboratory work was carried out in a positive pressured class 6 clean room, in an HEPA-filtered class 5  
 laminar flow hood wearing clean garments and nitrile gloves and following GEOTRACES 'Cookbook'  
 procedures (Cutter et al., 2017). All chemicals used were ultra-high purity grade solutions. To assess the  
 soluble ( $S_x$ ) and total ( $T_x$ ) concentrations of each target metal ("X") in aerosols, sampled filters were  
 115 processed through a sequential leaching protocol modified from Perron et al. (2020).  
 Measurements of Al, Cd, Cr, Cu, Fe, Ni, Pb, Ti, V and Zn are discussed in this study.  
 Briefly, aerosol samples were thawed at room temperature. Each filter was placed in a centrifuge tube,  
 soaked for 2h in 10 mL of ammonium acetate (1.4 M, pH 4.7) then centrifuged at 4200 rpm for 3  
 minutes. The operationally defined soluble fraction of metal in aerosols,  $S_x$ , was quantified in a 5 mL  
 120 aliquot of the leachate solution following evaporation of the acetate buffer and redissolution of the  
 residue into 0.15M nitric acid ( $HNO_3$ ). The residual 5mL of leachate together with the filter were  
 evaporated to dryness and digested using a mixture of concentrated hydrofluoric acid (14M, HF, 0.25  
 mL) and  $HNO_3$  (15M, 1mL) for 12 h at 120 °C. Following another round of  $HNO_3$  (5mL, 7M) digestion  
 and evaporation, the refractory fraction of metal in aerosols was quantified from a 5mL  $HNO_3$  (0.3M)  
 125 aliquot. Metal concentrations in aerosol leachates were determined by Sector Field Inductively Coupled  
 Plasma Mass Spectrometer (SF-ICP-MS, Element XR) at the Pôle Spectrométrie Ocean (Brest, France).  
 Indium (In, 10 ng g<sup>-1</sup>) was added as an internal standard in the analysed leachates to correct for  
 potential instrumental drift during analysis. The average procedural blank was subtracted from the trace  
 element mass measured in each leachate. The sum of measurements obtained in the two steps of the  
 130 protocol defines the total fraction of trace metals in aerosols,  $T_x$  (Perron et al., 2020).  
 The digestion and analysis of two reference materials, namely the Arizona Test Dust (<3 µm, Powder  
 Technologies Inc®) and the Bureau of Reference plankton certified reference material (BCR-414)  
 alongside the samples provided satisfactory recovery for all trace metals presented in this study (see  
 supplementary Table S2). Blank contributions to the sample measured concentrations were calculated  
 135 for each leaching step and are displayed in the supplementary Table S3. The refractory fraction of metal  
 in aerosol was, for some samples, below blank levels. These measurements, for which  $T_x$  only  
 corresponds to  $S_x$  concentration in aerosols (see Table S4), are flagged in red in Tables and are  
 excluded from subsequent calculations.

Concentrations of metals in aerosols are expressed in nanogram of metal “X” per cubic meter of air filtered ( $\text{ng m}^{-3}$ ). Aerosol fractional solubility is calculated as the ratio of soluble-to-total metal concentration ( $S_X/T_X$ ) in a sample expressed as a percentage.

## 2.3 Dust deposition flux estimate

Aluminium content measured in the collected aerosols was used to estimate lithogenic (dust) deposition flux ( $F_{\text{Dust}}$ ) in our study region.

Dust deposition was estimated assuming a prevailing crustal origin of Al and using the relative abundance of the metal,  $[Al]_{\text{UCC}}$ , in the upper continental crust (UCC) according to McLennan (2001). Based on assumptions made in previous studies (Baker et al., 2016; Marsay et al., 2022), a constant deposition velocity ( $V_d$ ) of  $1.2 \text{ cm s}^{-1}$  was used to calculate  $F_{\text{Dust}}$  following Eq. (1):

$$FDust = \frac{T_{Al} \times V_d}{[Al]_{UCC}} \quad (1)$$

where  $T_{Al}$  is the total Al concentration measured in aerosols, and  $[Al]_{\text{UCC}} = 8.04\%_{\text{w/w}}$  (McLennan, 2001). As particle dry deposition velocity is sensitive to the particle size, the relative humidity, and wind speed, this parameter cannot be accurately calculated for each sampling period investigated. Hence, we acknowledge that uncertainty is associated with the use of a constant deposition velocity which was previously estimated to range by a factor of 2-3 (Duce et al., 1991; Marsay et al., 2022).

Due to Al showing 100% solubility in the two lowest trace element mass loading samples A2 and A7 (suggesting significant influence from anthropogenic emissions), these two samples were excluded from the determination of  $F_{\text{Dust}}$  in our study.

## 2.4 Tracking the source of metal in aerosols

### 2.4.1 Air-mass back-trajectories

Air-mass back-trajectories (AMBT) were calculated for each aerosol sample mid-sampling location-to assess potential atmospheric source influence. The HYSPLIT model (Air Resources Laboratory, NOAA, Stein et al. (2015)) was run using R packages “Splitr” (Iannone, 2016) and “openair” (Carslaw and Ropkins, 2012) and Global Forecast System (GFS  $0.25^\circ \times 0.25^\circ$ ) meteorological data. AMBT were calculated 7 days back and at a height of 10m above the sea level. Cluster analysis was used to assess the proportion of major air-masses arriving at 3 key locations in our study region. Trajectories were run every 3 hours over the duration of the voyage at each of the 3 locations for cluster analysis. This analysis enabled to model the influence of less prevailing air-masses of terrestrial origin, which can have disproportionate influence on the particulate loading of marine aerosol samples and their elemental composition.

### 2.4.2 Enrichment factors

Enrichment factor (EF) is a common tool used to estimate the relative contribution of lithogenic versus anthropogenic source contained for each aerosol metal investigated. EFs were calculated as the ratio of



total metal “X”-to-Al concentration measured in aerosols compared to the same ratio in the upper continental crust (UCC), following Eq. (2):

$$EF(X) = \frac{\frac{TX}{TAl} aerosol}{\frac{TX}{TAl} UCC} \quad (2)$$

Aluminium crustal content (Al, 8.04%<sub>w/w</sub>, McLennan, 2001) was chosen as a reference in this study due to its reported prevailing lithogenic origin.

A threshold value of 10 was chosen, above which metal content in aerosols is deemed “enriched” by anthropogenic inputs (Shelley et al., 2015). Such threshold should be sufficiently high to account for natural variability across dust sources and fractionation processes during emission and aeolian transport (Hird et al., 2024; Reimann and de Caritat, 2005).

### 2.4.3 Statistical analysis

Pearson’s correlation test was performed to test for linear relationship between the total atmospheric concentration of paired trace elements. Supplementary Figure S3 summarizes the correlation factor calculated between each pair of elements as well as their degree of significance (p-value). In our study, Pearson’s r correlation factors were defined as very strong when ranging 0.8-1.0 (Strzelec et al., 2020), with a significant correlation set for p-value <0.01.

## 3. Results

### 3.1. Prevailing atmospheric transport during the RESILIENCE campaign

Typical single back-trajectory analysis of prevailing air-masses arriving at 10m altitude at the mid-sampling time and location of each sample collected during the RESILIENCE campaign are presented in the supplementary Figure S1. Such single trajectory analysis often highlighted a prevailing air-mass origin from long-range transport over the Southern Ocean, obscuring potential inputs from the two major landmasses present in our study region.

Since model observations suggest a decrease in atmospheric loading at lower latitude (<25° S) in our study region (Flamant et al., 2022; Gili et al., 2022; Jickells et al., 2005; Li et al., 2008a; Neff and Bertler, 2015), we divided our samples into three groups according to their locations (north vs south of 25° S and proximity to the two landmasses). Additional cluster analysis (Figure 2) was computed for the 2 groups of samples in order to account for the influence from less dominant yet higher loading terrestrial air-mass.

Group I and Group III consisted of aerosol samples collected south of 25° S, with the former sample group being collected at proximity to Madagascar (A1-A2, Figure 2a and 2b) and the latter, at proximity to southern Africa (A9-A10, Figure 2e and 2f). While Group I showed an influence from coastal air-masses originating from Madagascar (represented by the green, red and blue clusters in the Figure 2a

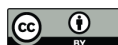

and 2b), which accounted for up to 69% of the total incoming air-masses, Group III seemed to receive no influence from the island at all (Figure 2e and 2f).

210 Group II included samples A3-A8, collected at the centre of the Channel, north to 25° S, within a small sampling perimeter. Group II was characterised by a prevailing atmospheric influence from long-range transport of westerly winds across the Southern Ocean (accounting for up to 86% of the incoming air-masses as represented by the red, orange, purple and green clusters in Figure 2c and 2d). Sporadic terrestrial inputs from inland Madagascar Island were also observed in Group II aerosols, contributing  
 215 14% of the total incoming air-masses (blue cluster on the Figure 2c and 2d).

A more detailed characterisation of individual air-mass trajectories composing each cluster (Figure 2b, 2d, 2f) also emphasised additional influence of coastal Madagascar air-masses on Group I aerosols (represented by the red and orange clusters) which could be overlooked when solely accounting for the coarse cluster analysis outputs (Figure 2a, 2c, 2d). Similarly, in the detailed cluster analysis (Figure 2b, 220 2d, 2f), atmospheric inputs from southern Africa cannot be ruled out in any aerosol group.

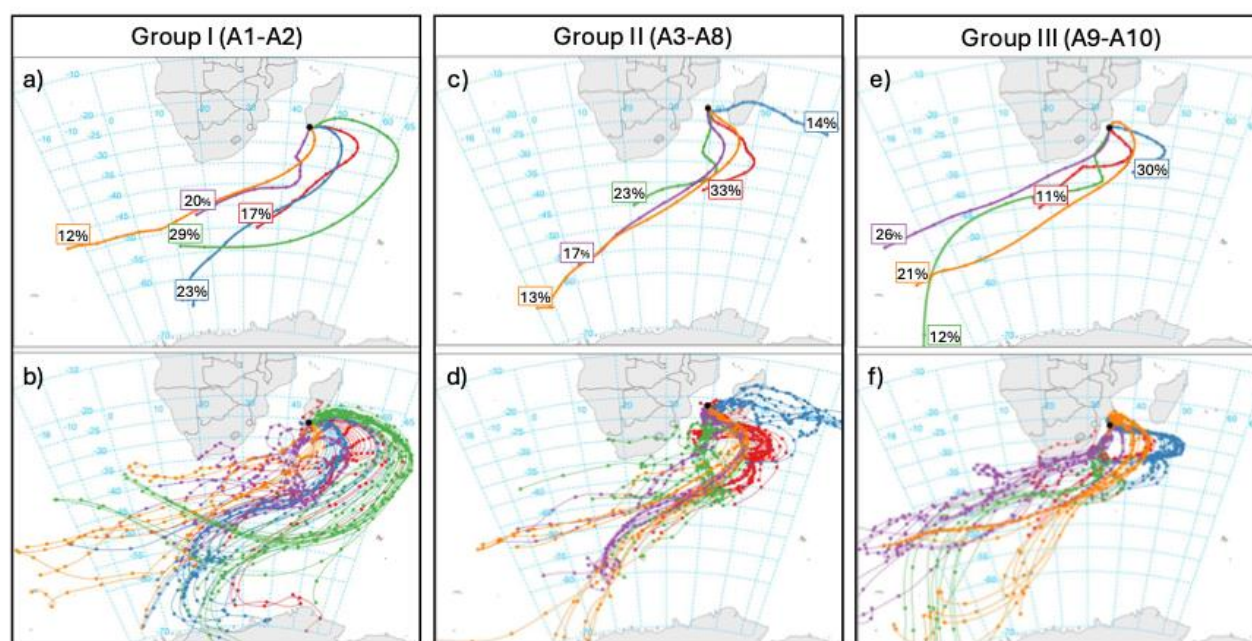

225 **Figure 2.** Seven day back-trajectory cluster analysis for the 5 prevailing air-masses arriving at 10m height at the middle location of each aerosol sample Group. Panels a), c) and d) represent the “coarse” cluster analysis including the contribution of each air-mass to the global atmospheric transport while panels b), d) and f) represent a “detailed” analysis including each air-mass trajectory and its associated cluster (colour code).

### 3.2. Total aeolian trace element loading over the southern Mozambique Channel

Trace element concentrations measured in individual aerosols collected in our study and total trace element mass loading data, defined as the sum of all 10 target element concentrations are reported in  
 230 Table 1. The trace element total mass loading in aerosols ranged from 5.0 to 87 ng m<sup>-3</sup>, with decreasing metal contents in samples in the following order: A6>A8>A3>A9>A1>A4>A5>A10>A7>A2. Interestingly, the trace element total mass loading measured in aerosols in our study showed a high

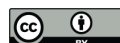

spatial variability with no hotspot for aeolian dust deposition identified and a seemingly random distribution of high and low total mass loading across the sampling region, regardless of the sample clusters defined above (aerosol sample Groups I, II and III).

Amongst the target metals, 99% of the trace element total mass loading in our samples was comprised of Al, Cr, Cu, Fe, Ti, and Zn. These elements are subsequently referred to as “major” trace elements as opposed to “minor” trace elements, which contributed less than remaining 1% of the total metal loading in aerosols (i.e., Cd, Ni, Pb, and V).

**Table 1. Total concentration of “major” (Al, Cr, Cu, Fe, Zn, and Ti) and “minor” (Cd, Ni, Pb, and V) trace elements measured in aerosol samples (A1-A10) over the southern Mozambique Channel. Median and median absolute deviation (MAD) values are indicated in the last column. Values indicated in red correspond to soluble trace metal concentrations when the refractory metal fraction was below procedural blank value and LQ represents soluble trace metal concentrations which are below the analytical limit of quantification (defined as 10\*standard deviation of the analytical blank). The sum of all 10 target element concentrations is displayed as the trace element total mass loading (TE loading).**

|                                                | A1   | A2  | A3    | A4   | A5   | A6    | A7   | A8    | A9   | A10  | Median±<br>MAD |
|------------------------------------------------|------|-----|-------|------|------|-------|------|-------|------|------|----------------|
| <i>Major trace elements, ng m<sup>-3</sup></i> |      |     |       |      |      |       |      |       |      |      |                |
| Al                                             | 21.6 | 0.2 | 35.8  | 11.5 | 8.5  | 55.9  | 3.0  | 54.6  | 22.1 | 9.2  | 16±11          |
| Cr                                             | 0.1  | 4.3 | 5.1   | 3.8  | 5.9  | 0.5   | 3.5  | 0.4   | 0.1  | 5.0  | 4±2            |
| Cu                                             | 1.4  | 0.2 | 0.8   | 0.3  | 0.3  | 0.8   | 0.2  | 1.0   | 1.6  | 0.04 | 0.5±0.4        |
| Fe                                             | 10.0 | LQ  | 3.6   | 2.1  | 0.8  | 9.9   | 0.8  | 7.5   | 8.6  | 1.1  | 3±2            |
| Ti                                             | 0.3  | LQ  | 3.4   | 0.7  | 0.9  | 7.9   | 0.3  | 3.1   | 4.3  | LQ   | 1±1            |
| Zn                                             | 3.1  | 0.2 | 8.5   | 6.4  | 0.5  | 11.8  | 0.8  | 15.4  | 2.8  | 0.2  | 3±3            |
| <i>Minor trace elements, pg m<sup>-3</sup></i> |      |     |       |      |      |       |      |       |      |      |                |
| Cd                                             | 21.3 | 2.4 | 141.8 | 55.0 | 13.4 | 172.3 | 8.1  | 233.7 | 4.6  | 9.7  | 17±14          |
| Ni                                             | 60.9 | 3.8 | 102.5 | 90.6 | 20.5 | 199.8 | 13.5 | 210.2 | 58.3 | 14.8 | 60±44          |
| Pb                                             | 34.2 | 3.0 | 54.8  | 22.6 | 3.5  | 70.3  | 7.0  | 83.3  | 38.2 | 1.8  | 28±25          |
| V                                              | 19.9 | LQ  | 12.1  | 3.6  | 6.2  | 27.2  | 3.7  | 21.9  | 20.2 | 3.4  | 9±7            |
| <i>TE loading,<br/>ng m<sup>-3</sup></i>       | 36.7 | 5.0 | 57.5  | 25.0 | 17.0 | 87.3  | 8.7  | 82.5  | 39.6 | 15.6 |                |

Trace element concentrations quantified in RESILIENCE aerosol samples ranged across four orders of magnitude, from a few picograms to tens of nanograms per cubic meter of air. Amongst major trace elements, the median concentration of Al (16±11 ng m<sup>-3</sup>) was at least 4 times greater than that of other major elements. Median concentrations of Cr (4±2 ng m<sup>-3</sup>) were slightly higher than that of Fe (3±2 ng m<sup>-3</sup>) and Zn (3±3 ng m<sup>-3</sup>) while smaller concentrations were found for Ti (1±1 ng m<sup>-3</sup>) and Cu (0.5±0.4 ng m<sup>-3</sup>) across the range of samples collected over the southern Mozambique channel. Amongst minor trace elements, Ni was the most abundant element (median: 60±44 pg m<sup>-3</sup>), followed by Pb (28±25 pg m<sup>-3</sup>), Cd (17±14 pg m<sup>-3</sup>), V (9±7 pg m<sup>-3</sup>).

Samples A2 and A7 stood out due to their overall low trace element content. In these aerosols, a number of analysed trace elements were only found in a soluble form (except for Cr, Cu and Ni in A2 and for



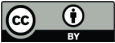

Cr, Cu, Fe, Ti and Pb in A7) and the total trace element mass loadings were lower than that of other aerosol samples. Soluble trace element contribution to individual aerosol samples is displayed in the supplementary Table S4.

255

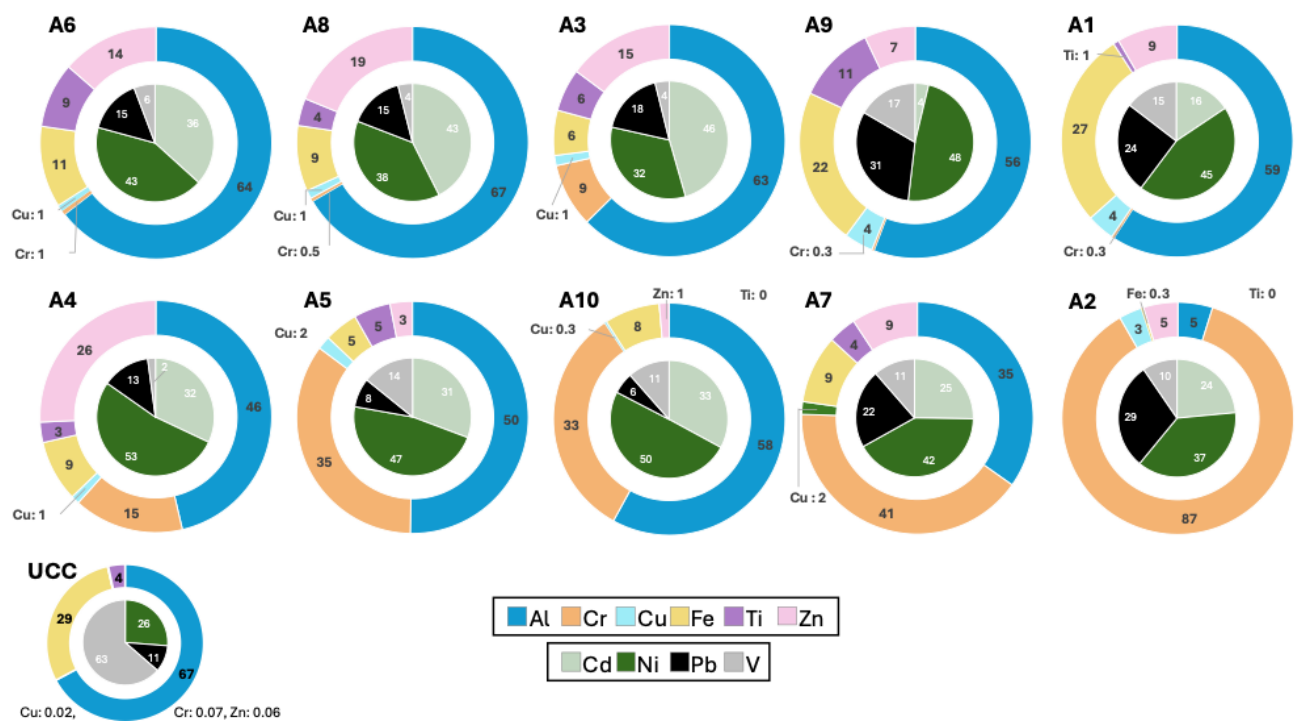

260

**Figure 3. Relative proportion (%) of total trace elements measured in aerosols (A1-A10) over the southern Mozambique Channel. The outer (inner) circle represents major (minor) trace elements composing over 99% (less than 1%) of the total trace element mass loading in individual samples. Samples are ordered according to decreasing total metal mass loading (A6>A3>A2). The relative composition of the average UCC (McLennan, 2001) when accounting for the same metals is shown for comparison.**

265

Figure 3 offers a visual representation of the relative proportion of major and minor total trace elements measured in each aerosol sample collected over the Mozambique Channel. As a major trace element in this study, Al constituted over half of the total trace element loading (46 - 66%) in most aerosol samples collected except for A7 (35%) and A2 (5%). Higher Al abundance was found in samples with the highest total metal loading (A8>A6>A3). Variable Fe and Ti content were found across aerosol samples with generally low relative Fe abundance compared to expected crustal average (UCC), except for A1 and A9. Contrastingly, high abundances were found for Cr, Cu and Zn, from 1 to 3 orders of magnitude higher than the average UCC. In particular, low total trace elements loading samples (A2, A7, A10 and A5) displayed extremely high Cr content, composing 33% up to 87% of the sample total trace element mass loading (Figure 3). Amongst the minor elements, high relative abundances in Cd and Ni were found, which contributed 0.01-0.3% and 0.08-0.4% of the total trace element mass loading, respectively. Relative Pb content (0.01-0.1% of the total trace element mass loading) in RESILIENCE aerosols was higher than in the average UCC, especially in A1, A2, A7 and A9.

275

### 3.3 Tracking sources of trace metal in aerosols from the southern Mozambique Channel

Enrichment factors were calculated to assess the contribution from non-lithogenic sources to individual trace elements measured in aerosols collected over the southern Mozambique Channel (Figure 4 and supplementary Figure S2), except for samples A2 and A7 where they could not be determined as the Al content in the refractory phase was below the detection limit.

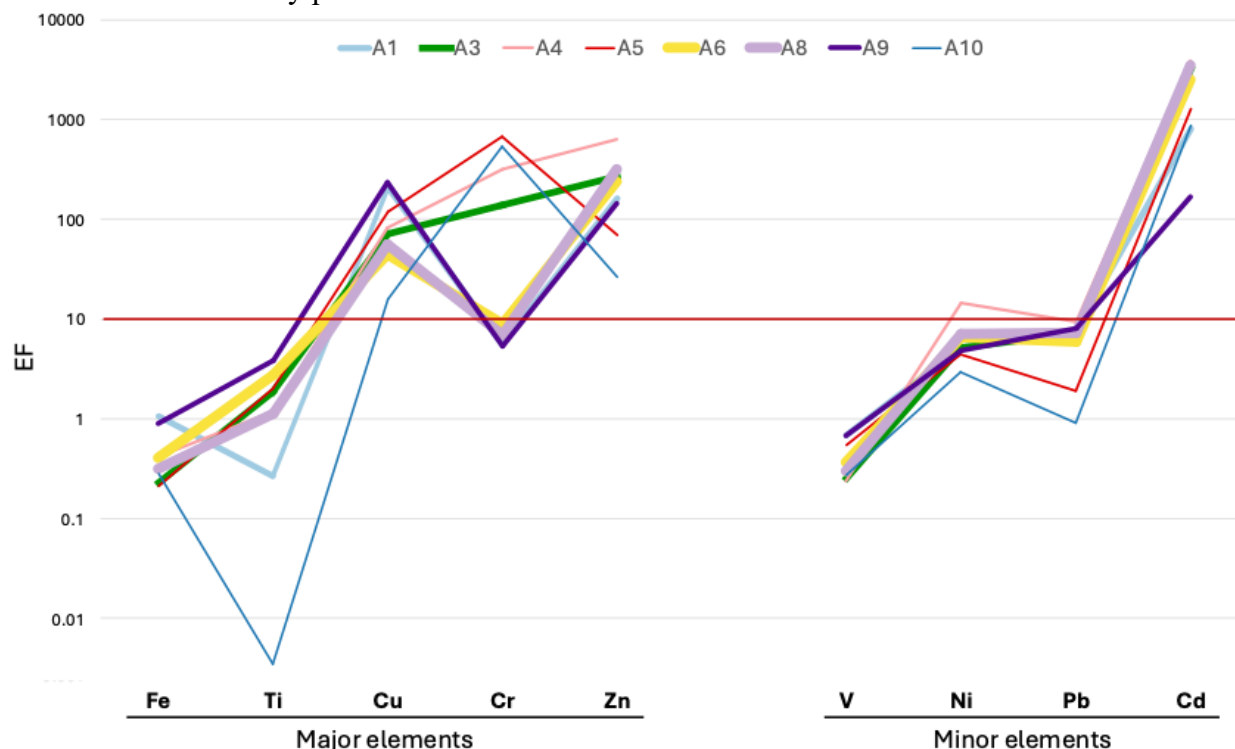

**Figure 4.** Enrichment factors calculated for each trace element measured in individual aerosol samples collected over the southern Mozambique Channel. The thickness of the line is proportional to the total metal loading in aerosols. The horizontal red line indicates the significant enrichment threshold value of 10 used in this study.

Amongst major elements, EFs close to 1 were found for Fe (median: 0.4) which indicated a prevailing lithogenic origin for Fe in all our aerosol samples (Figure 4). More variable EFs were calculated for Ti (median: 1.9); although values below the threshold of 10 also indicated a crustal origin for Ti in aerosols across the southern Mozambique Channel. Enrichment factors between 45 and 630 were found for Cu (median: 72) and Zn (median: 239), suggesting a prevailing anthropogenic origin of Cu and Zn in all aerosols collected in our study, except for A10. For these 2 elements, however, aerosol sample A10 was characterised by much lower EF values of 16 and 26, highlighting a less pronounced (yet prevailing) anthropogenic influence on this sample. Contrasting enrichment was obtained for Cr (median: 138), with insignificant enrichment ( $5 < EF < 9$ ) calculated for high total trace element mass loading samples (A1, A6, A8, and A9) and severe enrichment ranging 138 - 672 found in low trace element total mass loading samples (A4, A5, and A10) as well as in A3 (Figure 4).



Amongst minor elements, V, Ni and Pb showed no significant enrichment, with median EF values of 0.4, 5.2 and 7.2, respectively (Figure 4). This indicated a prevailing crustal origin for the three metals in most aerosol samples with the exception of Ni in sample A4 ( $EF_{Ni}=14$ ), which show enrichment slightly above the threshold value of 10. Extremely high enrichments were found for Cd (median: 2529) in all samples, with a particularly high median  $EF_{Cd}$  value of 3248 calculated for samples of Group II (A3-A8), collected north of 25° S in the centre of the Channel when compared to Group I (A1) and Group III samples (A9 and A10) which showed a median  $EF_{Cd}$  of 809.

## 4. Discussion

### 4.1 Dust deposition fluxes

The range of annual dust deposition flux calculated during the RESILIENCE cruise ( $40\text{--}263 \text{ mg m}^{-2} \text{ yr}^{-1}$ ) falls within the low end of  $F_{Dust}$  reported by Earth System Models (ESM) ( $0\text{--}788 \text{ mg m}^{-2} \text{ yr}^{-1}$ ) in the same 20° S–30° S area of the southern Mozambique Channel (Table 2). While ESM account for a yearly average  $F_{Dust}$ , our lower estimate is consistent with our study taking place at the beginning of the dry season (April–May), before the main dust and fire events which commonly occur from May to October on both Madagascar island and the southern African continent (Bhattachan et al., 2012; Ginoux et al., 2012). While we observe a large variability in our  $F_{Dust}$  estimates, the consistency between our values and the mean annual dust deposition fluxes reported by ESM in the 20° S–30° S region of the southern Mozambique channel could imply either 1) a limited year-to-year variability in dust deposition over the southern Mozambique Channel or 2) a poor constraint on  $F_{Dust}$  estimates by ESM due to a paucity of data. This second hypothesis is further supported by the large range of dust deposition fluxes reported by different modelling studies (references in Table 2). Additional field observations such those provided in our study would help refining model outputs in this drastically under sampled study region. Our field-based mean  $F_{Dust}$  estimates are consistent with southern Africa being a smaller dust source to the ocean south of 20° S (Kok et al., 2021; Li et al., 2008a), compared to other provinces downwind of Australian dust sources ( $328 \text{ mg m}^{-2} \text{ yr}^{-1}$ ; Hird et al., 2024) or that off the coast of South America ( $200\text{--}1200 \text{ mg m}^{-2} \text{ yr}^{-1}$ ; Menzel Barraqueta et al., 2019).

**Table 2. Median and median absolute deviation of the dust deposition fluxes ( $F_{Dust (Al)}$ ,  $\text{mg m}^{-2} \text{ yr}^{-1}$ ) calculated based on Al concentrations measured in RESILIENCE aerosols (southern Mozambique Channel), compared to fluxes reported by models in the southern Mozambique Channel region. Sample A2 and A7 were excluded from  $F_{Dust}$  calculation due to negligible lithogenic inputs in these samples.**

| Latitude | <b>Our study</b><br>$F_{Dust (Al)}$ | <sup>a</sup> Jickells et al.<br>(2005) | <sup>b</sup> Li et al.<br>(2008) | <sup>c</sup> Wagener et al.<br>(2008) | <sup>d</sup> Xu and Weber<br>(2021) | <sup>e</sup> Westberry et al.<br>(2023) |
|----------|-------------------------------------|----------------------------------------|----------------------------------|---------------------------------------|-------------------------------------|-----------------------------------------|
| 20°–25°S | <b>169±95</b>                       | 0–200                                  | 158–236                          | 2–18                                  | 30–100                              | ~183                                    |
| >25°S    | <b>101±2</b>                        | 0–500                                  | 158–788                          | 4–(36)*                               | 100–316                             | 91–(273)*                               |

<sup>a</sup>(Jickells et al., 2005), <sup>b</sup>(Li et al., 2008b), <sup>c</sup>(Wagener et al., 2008), <sup>d</sup>(Xu and Weber, 2021) <sup>e</sup>(Westberry et al., 2023)  
 \*Values reported south of 30°S.

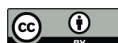

Model outputs displayed in Table 2 emphasise the south-eastwards transport of dust sources from the border junction of Namibia, Botswana and South Africa, across the African continent and into the southern Indian Ocean. Such atmospheric dust path is suggested to mostly reach latitudes south of 25° S or 30° S as depicted by high average  $F_{\text{Dust}}$  of 550 mg m<sup>-2</sup> yr<sup>-1</sup> reported in March during a seagoing campaign along the 32° S parallel between 30 and 40° E (Grand et al., 2015). Studies also report a decreasing influence (of a factor 2-3) of southern African dust sources as we move north of 25°S into the southern Mozambique Channel (Flamant et al., 2022; Gili et al., 2022; Jickells et al., 2005; Li et al., 2008a; Neff and Bertler, 2015; Piketh et al., 2002). Higher  $F_{\text{Dust}}$  estimates south of 25° S were not observed in our study where, on the contrary, 1.7 times increase in the mean  $F_{\text{Dust}}$  in Group II aerosol samples (Table 2) further emphasises the absence of the southern Africa dust outflow signature at the time of our study. According to HYSPLIT AMBT analysis, the prevailing atmospheric transport influencing our samples originated from the transport of westerly air-masses over the Southern Ocean, with sporadic passage over Madagascar Island and/or southern Africa that would provide most of the particulate loading in our samples. It is possible that, outside the local dust season (May-October), the south-eastwards transport of dust from major southern African sources may be absent or restricted to latitudes higher than 30° S and therefore cannot be considered as a source of dust to the Mozambique Channel. This conclusion highlights the important role of seasonality when comparing field-based measurements of dust fluxes to yearly average model estimates.

#### 4.2 Tracking potential sources of trace elements in aerosols

AMBT analysis suggested a few recent (<7 days) inputs of terrestrial air-masses (from South Africa and/or Madagascar island) to the southern Mozambique Channel atmospheric loading. The trace element composition in our aerosols was tentatively used to identify specific local sources to the atmosphere coming from both neighbouring landmasses.

**Table 3. Comparison of the average total trace element concentration (pmol m<sup>-3</sup>) measured in all aerosols collected over the southern Mozambique Channel (this study) with existing ship-board aerosol trace element measurements in the surrounding region (locations shown in Figure 1).**

|        | southern Mozambique Channel, this study | <sup>a</sup> Southern Indian (open) Ocean | <sup>b</sup> Tropical (open) Indian Ocean | <sup>c</sup> North of Reunion Island | <sup>d</sup> offshore Durban (coast) |
|--------|-----------------------------------------|-------------------------------------------|-------------------------------------------|--------------------------------------|--------------------------------------|
| season | April (early dry)                       | November (wet)                            | May (dry)                                 | November (wet)                       | March (wet)                          |
| site   | -25° S, 38° E                           | -30° S, 65° E                             | -8° S, 45° E                              | -15° S, 60° E                        | -32° S, 32° E                        |
| Al     | 822±753                                 | 772                                       | 815                                       | 1200                                 | 300 - 3600                           |
| Cu     | 10±9                                    | 68                                        | 3                                         | 30                                   | 20 - 75                              |
| Cr     | 55±44                                   | 9                                         | 3                                         | 7                                    |                                      |
| Fe     | 80±73                                   | 484                                       | 286                                       | 200                                  | 1500                                 |
| Ti     | 44±54                                   | 39                                        |                                           |                                      |                                      |
| Zn     | 76±82                                   | 29                                        | 6                                         | 100                                  | 200                                  |



|    |         |     |      |      |         |
|----|---------|-----|------|------|---------|
| Cd | 0.6±0.8 | 0.1 | 0.05 | 0.09 | 0.2     |
| Ni | 1±1     | 9   | 2    | 10   | 18 - 53 |
| Pb | 0.2±0.1 | 0.9 | 1    | 3    | 1 - 6   |
| V  | 0.2±0.2 | 1   | 1    | 0.8  |         |

<sup>a</sup>(Ge et al., 2024), <sup>b</sup>(Chester et al., 1991), <sup>c</sup>(Witt et al., 2010), <sup>d</sup>(Witt et al., 2006).

350

355

360

365

370

375

380

385

Overall, average atmospheric trace element concentrations measured in this study were similar (Al, Cu, and Ti) or lower (Fe, Ni, Pb and V) than data reported for marine air-masses over the southern Indian Ocean (Table 3, Chester et al., 1991; Ge et al., 2024). This finding reinforced our AMBT analysis showing a predominant influence from long-range atmospheric transport of westerly winds from across the Southern Ocean (Figure 2). However, sporadic inputs of lithogenic Al, Fe, Ni, Pb, Ti and V ( $EF_{Cu}<10$ , Figure 4) and anthropogenic Cu ( $EF_{Cu}=72$ , Figure 4) emissions from Madagascar and southern Africa cannot be ruled out given the proximity of both landmasses and the extensive and increasing anthropogenic activity they hold (including copper mining and smelting activity in South Africa and Zambia, Makgetla et al., 2019; Nex and Kinnaird, 2019; Sikamo, 2016). Higher concentrations of anthropogenic Zn ( $EF_{Zn}=239$ , Figure 4) in our samples resembled concentrations reported downwind of anthropogenic emission sources in the southwestern Indian Ocean (Witt et al., 2006, 2010). Major sources of anthropogenic Zn to the atmosphere include coal combustion, non-ferrous metal smelting and non-exhaust traffic emissions (Schleicher and Weiss, 2023; Wei et al., 2025). While no specific source could be pinpointed in our study, a large extent of so-called “coalfields” in the eastern and northern regions of South Africa (Hancox and Götz, 2014; Nundze et al., 2024) could be a source of Zn to the southern Mozambique Channel north of 25° S (Group II aerosols), where Zn enrichment is overall 3 times higher than in Group I and Group III samples (except for sample A5). Solid coal combustion is also widely used for cooking and heating, in a vast majority of Malagasy households (Dasgupta et al., 2013) as well as in South Africa townships (Balmer, 2007), although the magnitude of emissions linked to such practises remains unknown. Another source of Zn to the north of our study region could originate from metal smelting activities. Unlike Group I and III aerosol samples, a very strong and significant ( $p<0.01$ ) correlation between Zn, Cd and Cu was found in our Group II samples (Figure S3) similar to previously reported near smelter facilities (Kasongo et al., 2024; Taylor et al., 2010). In addition, industrial combustion of coal was previously associated with Pb-containing easily transported fine particles while smelters tend to release coarse particle-bound Pb. The latter emissions are easier to mitigate at the source and less likely to undergo long-range aeolian transport (Zhang et al., 2024). In our study, small concentrations and insignificant enrichments of Pb in aerosols collected across the southern Mozambique Channel tend to support the role of smelter emissions as a source of atmospheric Zn, Cu and Cd rather than coal combustion emissions. Our results are in line with a modelling study by Ito and Miyakawa (2023) showing that emissions from metal production (smelting) is a major, and often overlooked, source of labile trace elements to the atmosphere over the Mozambique Channel, especially in fall when dust and pyrogenic sources are low. Most trace elements measured in Group II aerosols showed very strong and significant ( $p$ -value  $<0.01$ ) correlation to Al, except for Cr and Ti (supplementary Figure S3). Such a widespread correlation between lithogenic and anthropogenic elements highlights the complex atmospheric influence in our



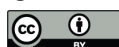

study region as depicted in Figure 2. In aerosols collected south of 25° S (sample Groups I and III), less significant correlations were found between trace elements investigated (Figure S3).

#### 4.3 A remaining challenge: fingerprinting mining emissions in aerosols

390 Amongst all trace elements measured in this study, atmospheric Cr and Cd measurements in aerosols  
 collected over the southern Mozambique Channel stood out, with concentrations 6-18 times and 3-12  
 times higher than that previously reported in the surrounding region (Table 3), respectively. Such  
 elevated metal loadings were likely associated with anthropogenic emissions as indicated by high  
 median enrichment factors ( $EF_{Cr}=138$  and  $EF_{Cd}=3248$ , Figure 4) and suggested the existence of  
 395 significant inputs from local aeolian sources of Cr and Cd to the southern Mozambique Channel.  
 A negative correlation between Cr and Cd in our aerosol samples (Figure S3) suggests two distinct  
 sources influence the atmospheric loading of these elements in the atmosphere over the Mozambique  
 Channel. High atmospheric loading in Cd and Cr in our samples may raise some concern as the two  
 metals are known pollutants with acute toxicity to both humans (Csavina et al., 2012; Ericson et al.,  
 400 2008) and ecosystems (Athar and Ahmad, 2002). More specifically, high soluble fractions of Cr  
 measured in aerosol samples A7- A10 (supplementary Table S4) collected on the western part of the  
 southern Mozambique Channel, may indicate a predominance of Cr(VI) in the atmosphere which is  
 carcinogenic (Świetlik et al., 2011).

Widespread Cd enrichment was observed throughout our sampling region, with an average 4.6 times  
 405 increase in  $EF_{Cd}$  values in Group II aerosols (A3-A8, Figure 4) compared to aerosols collected south of  
 25° S (sample Groups I and III). As suggested in section 4.2, Cd emissions from smelting activities  
 have previously been linked to elevated aerosol enrichment ( $EF_{Cd/(Al)} > 1000$ ) over the Atlantic Ocean  
 (Shelley et al., 2015). In addition, extreme Cd enrichments relative to Fe ( $EF_{Cd/(Fe)}$ ) up to 18800 were  
 also reported in dust samples collected around gold mine tailing storage facilities in the South African  
 410 Witwatersrand Basin (Maseki et al., 2017). In our study, Cd enrichment factors relative to Fe exceeded  
 763 in nearly all our aerosol samples, except in A9. A further 10-fold increase in the median enrichment  
 factor of Cd relative to Fe ( $EF_{Cd/Fe} = 7766$ , Table 4) was found in aerosols from Group II compared to  
 those of Group I and Group III ( $EF_{Cd/Fe} = 763$ , Table 4), potentially suggesting a contribution from gold  
 mining activities in South Africa or in Madagascar to the Cd atmospheric loading in the southern  
 415 Mozambique Channel to the north of 25° S. Notably, elevated Cd concentrations have also previously  
 been reported in squids, a known bioaccumulating species, in waters around Reunion Island (to the east  
 of our study region), although the source of Cd in that study remained unidentified (Annasawmy et al.,  
 2022).

Concerning Cr enrichments were observed in samples containing lower total metal mass loading (A4,  
 420 A5, and A10) as well as in A3 (Figures 3 and 4). Elevated atmospheric Cr(VI) concentrations were  
 previously associated with emissions from the ferrochrome industry in the Bushveld Igneous complex,  
 South Africa (Venter et al., 2017). However, Venter and colleagues (2017) report a co-enrichment in Cr  
 and Fe in aerosols which we do not observe in our samples. South Africa also holds 72–80% of the  
 world's viable chromite ore reserves (Coetzee et al., 2020). Chromite rocks mined in Madagascar



425 (Grieco et al., 2014) and South Africa (Kleynhans et al., 2023) have typical Cr/Fe ratios of 1.5-2.9,  
 which largely exceeds the Cr/Fe ratio of 0.0024 in the average UCC (McLennan, 2001). Similar or  
 higher Cr/Fe ratios ( $>1.4$ ) were found in our samples A3, A4, A5, A7 and A10), indicating that Cr  
 mining emissions might be a major contributor to the aeolian Cr loading in the southern Mozambique  
 Channel north of  $25^{\circ}$  S (A3-A8) and close to South African coastlines (A10). While chromite mines are  
 430 mostly concentrated in the north of Madagascar and in the Bushveld Igneous complex in South Africa,  
 HYSPLIT AMBT analyses associated with our samples only rarely (Madagascar) or never (Bushveld)  
 crossed these sources (supplementary Figure 2 and Figure S1). It is possible that our ABMT analyses  
 does not comprise all air-masses influencing our samples and that minor atmospheric inputs from high  
 loading terrestrial air-masses remain overlooked. In addition, other unidentified source of Cr may be  
 435 influencing the atmospheric loading in our study region. For example, in Richards Bay, South Africa,  
 discharges from the industrial sector were linked to significant enrichment in Cr, and to a lesser extent  
 in Cd and Cu in local sediment samples collected in the harbour (Izegaegbe et al., 2023). Chromium  
 enrichment was also previously reported in airborne particulates associated with coal mines (Dubey et  
 al., 2012), which could also be a source in our study region. On Madagascar Island, chromium  
 440 contamination of soil and water streams were also reported as a result of tannery and textile wastewater  
 (Rasoazanany et al., 2007). Overall, our results highlight the difficulty in tracking aerosol trace element  
 source in aerosols in the absence of specific tracers.

**Table 4. Total atmospheric trace element concentration ratios (g/g) used in previous studies to trace specific anthropogenic sources in aerosols and their respective values in samples collected over the southern Mozambique Channel (this study). A2 was excluded due to extreme Fe and Cr solubility (100%) in this sample, which potentially bias the ratios displayed.**

| Variable             | Source                         | Reported values | A1    | A3           | A4          | A5         | A6    | A7         | A8           | A9    | A10        |
|----------------------|--------------------------------|-----------------|-------|--------------|-------------|------------|-------|------------|--------------|-------|------------|
| Cr/Fe                | <sup>a,b</sup> Chromite mining | 1.5-2.9         | 0.013 | <b>1.4</b>   | <b>1.8</b>  | <b>7.4</b> | 0.053 | <b>4.3</b> | 0.051        | 0.014 | <b>4.5</b> |
| EF <sub>Cd(Fe)</sub> | <sup>c</sup> Gold mining       | <18800          | 763   | <b>14107</b> | <b>9291</b> | 5990       | 6242  | 3538       | <b>11117</b> | 190   | 3084       |

<sup>a</sup>(Grieco et al., 2014), <sup>b</sup>(Kleynhans et al., 2023), <sup>c</sup>(Maseki et al., 2017)

## Conclusion

445 The sub-equatorial region of southern Africa drastically suffers from climate change, with temperatures  
 rising above the global average and increasing frequency of extreme weather events (e.g., droughts,  
 floods, cyclones, fires). This region is also affected by rapid urbanization and industrialisation of lands  
 (Scholes et al., 2015). Such a variety of natural and anthropogenic influences most likely contribute to  
 the atmospheric composition of the region, introducing both (bio)essential and toxic elements into the  
 atmosphere. This study provides the **first** chemical characterisation of the trace element composition in  
 450 aerosols collected over the southern Mozambique Channel ( $20^{\circ}$  S- $30^{\circ}$  S) during the austral autumn  
 2022, when dust deposition and fire occurrence are both low (Bhattachan et al., 2012; Ginoux et al.,  
 2012). We report a complex atmospheric circulation in the region. Indeed, while 7-day single air-mass

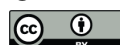

back-trajectory computed for each sample suggested a prevailing long-range transport of aerosols by westerly winds at latitudes  $>25^{\circ}$  S, a full understanding of the sources influencing the trace element loading over the southern Mozambique Channel could not be achieved without accounting for less prevailing and sporadic inputs from sources on the two major landmasses of Southern Africa and Madagascar (through detailed cluster analysis). Our observation stresses the need to investigate the full complexity of atmospheric circulation (beyond single prevailing air-mass analysis) as less frequent, terrestrial air-masses can have disproportionate impact on the particulate loading (and trace element composition) of aerosols in low deposition marine region across the Southern Hemisphere. Atmospheric metal concentrations measured in our samples were similar (Al, Cu, and Ti) or smaller (Fe, Ni, Pb and V) than concentrations previously reported in marine air-masses downwind of Southern Hemisphere emission sources. This confirmed that our study occurred during the low deposition season and that concentrations presented for the above-mentioned trace elements can be considered as background (low end) aeolian concentrations. Trace elements commonly associated with crustal sources (Al, Fe, Ti) showed no significant enrichments relative to the averaged UCC ( $EF < 10$ ) neither did Ni, Pb, and V despite the three metals being sometimes related to human emissions in other studies. High concentrations of Zn (and elevated Cu enrichment factor) in aerosols were associated with anthropogenic emissions which could include coal combustion and smelting. Concentrations of Cd and Cr in our aerosol samples were 3 – 18 times higher than those reported in the literature near our study region and were associated with high Cr and extremely high Cd enrichments compared to the average UCC. Further analysis of atmospheric sources using elemental ratios in individual aerosol samples suggested inputs from mining activities (chromite: Cr, gold: Cd) to the atmosphere, especially in the central Channel between  $20^{\circ}$  S- $25^{\circ}$  S and close to the southern coastline of South Africa. Our study emphasises the difficulty in tracking specific sources of atmospheric trace elements over marine regions due to the lack of defined atmospheric tracers for specific sources such as smelting and mining for example.

## Acknowledgements

The RESILIENCE cruise was supported by the French National Oceanographic Fleet operated by Ifremer, by the Belmont Forum Ocean Front Change project, implemented through the French National Research Agency (ANR-20- BFOC-0006-04), by the ISblue project, Interdisciplinary graduate school for the blue planet (ANR-17-EURE-0015) and co-funded by a grant from the French government under the program “Investissements d’Avenir” embedded in France 2030, and by the French National program LEFE (Les Enveloppes Fluides et l’Environnement). Authors wish to thank S. Herbette, M. Noyon, P. Penven and J.-F. TERNON, P.I.s of the RESILIENCE MD#257 cruise (Ternon et al., 2022) and project and the crew of the R/V ‘Marion Dufresne’ (LDA, French Oceanographic Fleet) for their help and assistance.

M.M.G.P was funded by a European Marie Skłodowska-Curie Actions fellowship number GA 101064063 and by an ISblue project, Interdisciplinary graduate school for the blue planet (ANR-17-

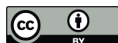

EURE-0015) and co-funded by a grant from the French government under the program "Investissements d'Avenir" embedded in France 2030.

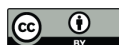

## References

- Annasawmy, P., Bustamante, P., Point, D., Churlaud, C., Romanov, E. V., and Bodin, N.: Trace  
 495 elements and  $\delta^{15}\text{N}$  values in micronekton of the south-western Indian Ocean, *Mar Pollut Bull*, 184,  
 114053, <https://doi.org/10.1016/j.marpolbul.2022.114053>, 2022.
- Athar, R. and Ahmad, M.: Heavy Metal Toxicity: Effect on Plant Growth and Metal Uptake by Wheat,  
 and on Free Living Azotobacter, *Water Air Soil Pollut*, 138, 165–180,  
<https://doi.org/10.1023/A:1015594815016>, 2002.
- 500 Baker, A. R., Landing, W. M., Bucciarelli, E., Cheize, M., Fietz, S., Hayes, C. T., Kadko, D., Morton,  
 P. L., Rogan, N., Sarthou, G., Shelley, R. U., Shi, Z., Shiller, A., and van Hulten, M. M. P.: Trace  
 element and isotope deposition across the air–sea interface: progress and research needs, *Philosophical  
 Transactions of the Royal Society A: Mathematical, Physical and Engineering Sciences*, 374, 20160190,  
<https://doi.org/10.1098/rsta.2016.0190>, 2016.
- 505 Balmer, M.: Household coal use in an urban township in South Africa, *Journal of Energy in Southern  
 Africa*, 18, 27–32, <https://doi.org/10.17159/2413-3051/2007/v18i3a3382>, 2007.
- Barimalala, R., Wainwright, C., Kolstad, E. W., and Demissie, T. D.: The 2019–21 drought in southern  
 Madagascar, *Weather Clim Extrem*, 46, 100723, <https://doi.org/10.1016/j.wace.2024.100723>, 2024.
- Bhattachan, A., D’Odorico, P., Baddock, M. C., Zobeck, T. M., Okin, G. S., and Cassar, N.: The  
 510 Southern Kalahari: a potential new dust source in the Southern Hemisphere?, *Environmental Research  
 Letters*, 7, 024001, <https://doi.org/10.1088/1748-9326/7/2/024001>, 2012.
- Bhattachan, A., D’Odorico, P., and Okin, G. S.: Biogeochemistry of dust sources in Southern Africa, *J  
 Arid Environ*, 117, 18–27, <https://doi.org/10.1016/j.jaridenv.2015.02.013>, 2015.
- Carslaw, D. C. and Ropkins, K.: openair — An R package for air quality data analysis, *Environmental  
 515 Modelling & Software*, 27–28, 52–61, <https://doi.org/10.1016/j.envsoft.2011.09.008>, 2012.
- Chester, R., Berry, A. S., and Murphy, K. J. T.: The distributions of particulate atmospheric trace metals  
 and mineral aerosols over the Indian Ocean, *Mar Chem*, 34, 261–290, [https://doi.org/10.1016/0304-4203\(91\)90007-J](https://doi.org/10.1016/0304-4203(91)90007-J), 1991.
- Coetzee, J. J., Bansal, N., and Chirwa, E. M. N.: Chromium in Environment, Its Toxic Effect from  
 520 Chromite-Mining and Ferrochrome Industries, and Its Possible Bioremediation, *Expo Health*, 12, 51–  
 62, <https://doi.org/10.1007/s12403-018-0284-z>, 2020.
- Csavina, J., Field, J., Taylor, M. P., Gao, S., Landázuri, A., Betterton, E. A., and Sáez, A. E.: A review  
 on the importance of metals and metalloids in atmospheric dust and aerosol from mining operations,  
*Science of The Total Environment*, 433, 58–73, <https://doi.org/10.1016/j.scitotenv.2012.06.013>, 2012.
- 525 Cutter, G. A., Casciotti, K., Croot, P., Geibert, W., Heimbürger, L.-E., Lohan, M. C., Planquette, H.,  
 and Flierdt, T. van de.: Sampling and Sample-Handling Protocols for GEOTRACES Cruises, Version  
 3.0, 2017.
- Dasgupta, S., Martin, P., and Samad, H. A.: Addressing Household Air Pollution: A Case Study in  
 Rural Madagascar., 2013.
- 530 Department of Transport, S. A.: Annual Report for 2016/17 Financial Year Vote 35, 2017.
- Dubey, B., Pal, A. K., and Singh, G.: Trace metal composition of airborne particulate matter in the coal  
 mining and non-mining areas of Dhanbad Region, Jharkhand, India, *Atmos Pollut Res*, 3, 238–246,  
<https://doi.org/10.5094/APR.2012.026>, 2012.





- Duce, R. A., Liss, P. S., Merrill, J. T., Atlas, E. L., Buat-Menard, P., Hicks, B. B., Miller, J. M.,  
 535 Prospero, J. M., Arimoto, R., Church, T. M., Ellis, W., Galloway, J. N., Hansen, L., Jickells, T. D.,  
 Knap, A. H., Reinhardt, K. H., Schneider, B., Soudine, A., Tokos, J. J., Tsunogai, S., Wollast, R., and  
 Zhou, M.: The atmospheric input of trace species to the world ocean, *Global Biogeochem Cycles*, 5,  
 193–259, <https://doi.org/10.1029/91GB01778>, 1991.
- Ericson, B., Hanrahan, D., and Kong, V.: The World's Worst Pollution Problems: The Top Ten of the  
 540 Toxic Twenty, 2008.
- Flamant, C., Gaetani, M., Chaboureaud, J.-P., Chazette, P., Cuesta, J., Piketh, S. J., and Formenti, P.:  
 Smoke in the river: an Aerosols, Radiation and Clouds in southern Africa (AEROCLO-sA) case study,  
*Atmos Chem Phys*, 22, 5701–5724, <https://doi.org/10.5194/acp-22-5701-2022>, 2022.
- Frappier-Brinton, T. and Lehman, S. M.: The burning island: Spatiotemporal patterns of fire occurrence  
 545 in Madagascar, *PLoS One*, 17, e0263313, <https://doi.org/10.1371/journal.pone.0263313>, 2022.
- Ge, Y., Guan, W., Wong, K. H., and Zhang, R.: Spatial Variability and Source Identification of Trace  
 Elements in Aerosols From Northwest Pacific Marginal Sea, Indian Ocean and South Pacific to  
 Antarctica, *Global Biogeochem Cycles*, 38, <https://doi.org/10.1029/2024GB008235>, 2024.
- Gili, S., Vanderstraeten, A., Chaput, A., King, J., Gaiero, D. M., Delmonte, B., Vallenga, P.,  
 550 Formenti, P., Di Biagio, C., Cazana, M., Pangui, E., Doussin, J.-F., and Mattioli, N.: South African  
 dust contribution to the high southern latitudes and East Antarctica during interglacial stages, *Commun  
 Earth Environ*, 3, 129, <https://doi.org/10.1038/s43247-022-00464-z>, 2022.
- Ginoux, P., Prospero, J. M., Gill, T. E., Hsu, N. C., and Zhao, M.: Global-scale attribution of  
 anthropogenic and natural dust sources and their emission rates based on MODIS Deep Blue aerosol  
 555 products, *Reviews of Geophysics*, 50, <https://doi.org/10.1029/2012RG000388>, 2012.
- Grand, M. M., Measures, C. I., Hatt, M., Morton, P. L., Barrett, P., Milne, A., Resing, J. A., and  
 Landing, W. M.: The impact of circulation and dust deposition in controlling the distributions of  
 dissolved Fe and Al in the south Indian subtropical gyre, *Mar Chem*, 176, 110–125,  
<https://doi.org/10.1016/j.marchem.2015.08.002>, 2015.
- Grieco, G., Merlini, A., Pedrotti, M., Moroni, M., and Randrianja, R.: The origin of Madagascar  
 560 chromitites, *Ore Geol Rev*, 58, 55–67, <https://doi.org/10.1016/j.oregeorev.2013.11.002>, 2014.
- Hancox, P. J. and Götz, A. E.: South Africa's coalfields — A 2014 perspective, *Int J Coal Geol*, 132,  
 170–254, <https://doi.org/10.1016/j.coal.2014.06.019>, 2014.
- Hird, C., Perron, M. M. G., Holmes, T. M., Meyerink, S., Nielsen, C., Townsend, A. T., de Caritat, P.,  
 565 Strzelec, M., and Bowie, A. R.: On the use of lithogenic tracer measurements in aerosols to constrain  
 dust deposition fluxes to the ocean southeast of Australia, *Aerosol Research*, 2, 315–327,  
<https://doi.org/10.5194/ar-2-315-2024>, 2024.
- Hooper, J. and Marx, S.: A global doubling of dust emissions during the Anthropocene?, *Glob Planet  
 Change*, 169, 70–91, <https://doi.org/10.1016/j.gloplacha.2018.07.003>, 2018.
- Iannone, R.: SplitR, <https://doi.org/doi.org/10.5281/zenodo.49106>, 2016.
- Iimi, A.: Estimating the demand for informal public transport: evidence from Antananarivo,  
 Madagascar, *Public Transport*, 15, 129–168, <https://doi.org/10.1007/s12469-022-00300-9>, 2023.
- Jickells, T. D., An, Z. S., Andersen, K. K., Baker, A. R., Bergametti, G., Brooks, N., Cao, J. J., Boyd, P.  
 W., Duce, R. A., Hunter, K. A., Kawahata, H., Kubilay, N., laRoche, J., Liss, P. S., Mahowald, N.,  
 575 Prospero, J. M., Ridgwell, A. J., Tegen, I., and Torres, R.: Global Iron Connections Between Desert



- Dust, Ocean Biogeochemistry, and Climate, *Science* (1979), 308, 67–71,  
<https://doi.org/10.1126/science.1105959>, 2005.
- Kasongo, J., Alleman, L. Y., Kanda, J.-M., Kaniki, A., and Riffault, V.: Metal-bearing airborne particles from mining activities: A review on their characteristics, impacts and research perspectives, *Science of The Total Environment*, 951, 175426, <https://doi.org/10.1016/j.scitotenv.2024.175426>, 2024.
- 580 Kleynhans, E. L. J., Beukes, J. P., van Zyl, P. G., and du Preez, S. P.: Chemical beneficiation of chromite ore to improve the chromium-to-iron ratio for ferrochrome production, *Miner Eng*, 201, 108196, <https://doi.org/10.1016/j.mineng.2023.108196>, 2023.
- Kok, J. F., Adebisi, A. A., Albani, S., Balkanski, Y., Checa-Garcia, R., Chin, M., Colarco, P. R.,  
 585 Hamilton, D. S., Huang, Y., Ito, A., Klose, M., Li, L., Mahowald, N. M., Miller, R. L., Obiso, V., Pérez García-Pando, C., Rocha-Lima, A., and Wan, J. S.: Contribution of the world's main dust source regions to the global cycle of desert dust, *Atmos Chem Phys*, 21, 8169–8193, <https://doi.org/10.5194/acp-21-8169-2021>, 2021.
- Kumar, K. R., Sivakumar, V., Yin, Y., Reddy, R. R., Kang, N., Diao, Y., Adesina, A. J., and Yu, X.:  
 590 Long-term (2003–2013) climatological trends and variations in aerosol optical parameters retrieved from MODIS over three stations in South Africa, *Atmos Environ*, 95, 400–408, <https://doi.org/10.1016/j.atmosenv.2014.07.001>, 2014.
- Li, F., Ginoux, P., and Ramaswamy, V.: Distribution, transport, and deposition of mineral dust in the Southern Ocean and Antarctica: Contribution of major sources, *Journal of Geophysical Research: Atmospheres*, 113, <https://doi.org/10.1029/2007JD009190>, 2008a.
- 595 Li, F., Ginoux, P., and Ramaswamy, V.: Distribution, transport, and deposition of mineral dust in the Southern Ocean and Antarctica: Contribution of major sources, *Journal of Geophysical Research: Atmospheres*, 113, <https://doi.org/10.1029/2007JD009190>, 2008b.
- Mahlalela, P. T., Blamey, R. C., Hart, N. C. G., and Reason, C. J. C.: Drought in the Eastern Cape region of South Africa and trends in rainfall characteristics, *Clim Dyn*, 55, 2743–2759, <https://doi.org/10.1007/s00382-020-05413-0>, 2020.
- 600 Mahowald, N. M., Baker, A. R., Bergametti, G., Brooks, N., Duce, R. A., Jickells, T. D., Kubilay, N., Prospero, J. M., and Tegen, I.: Atmospheric global dust cycle and iron inputs to the ocean, *Global Biogeochem Cycles*, 19, <https://doi.org/10.1029/2004GB002402>, 2005.
- 605 Makgetla, N., Levin, S., and Mtanga, S.: Moving up the copper value chain in Southern Africa, *UNU-WIDER*, <https://doi.org/10.35188/UNU-WIDER/2019/686-9>, 2019.
- Marsay, C. M., Kadko, D., Landing, W. M., and Buck, C. S.: Bulk Aerosol Trace Element Concentrations and Deposition Fluxes During the U.S. GEOTRACES GP15 Pacific Meridional Transect, *Global Biogeochem Cycles*, 36, <https://doi.org/10.1029/2021GB007122>, 2022.
- 610 Maseki, J., Annegarn, H. J., and Spiers, G.: Health risk posed by enriched heavy metals (As, Cd, and Cr) in airborne particles from Witwatersrand gold tailings, *J South Afr Inst Min Metall*, 117, 663–669, <https://doi.org/10.17159/2411-9717/2017/v117n7a8>, 2017.
- McLennan, S. M.: Relationships between the trace element composition of sedimentary rocks and upper continental crust, *Geochemistry, Geophysics, Geosystems*, 2, <https://doi.org/10.1029/2000GC000109>,  
 615 2001.



- Mendez, J., Guieu, C., and Adkins, J.: Atmospheric input of manganese and iron to the ocean: Seawater dissolution experiments with Saharan and North American dusts, *Mar Chem*, 120, 34–43, <https://doi.org/10.1016/j.marchem.2008.08.006>, 2010.
- 620 Menzel Barraqueta, J.-L., Klar, J. K., Gledhill, M., Schlosser, C., Shelley, R., Planquette, H. F., Wenzel, B., Sarthou, G., and Achterberg, E. P.: Atmospheric deposition fluxes over the Atlantic Ocean: a GEOTRACES case study, *Biogeosciences*, 16, 1525–1542, <https://doi.org/10.5194/bg-16-1525-2019>, 2019.
- Mirzania, P., Gordon, J. A., Balta-Ozkan, N., Sayan, R. C., and Marais, L.: Barriers to powering past coal: Implications for a just energy transition in South Africa, *Energy Res Soc Sci*, 101, 103122, <https://doi.org/10.1016/j.erss.2023.103122>, 2023.
- 625 Morosele, I. P. and Langerman, K. E.: The impacts of commissioning coal-fired power stations on air quality in South Africa: insights from ambient monitoring stations, *Clean Air Journal*, 30, <https://doi.org/10.17159/caj/2020/30/2.8833>, 2020.
- Morton, P. L., Landing, W. M., Hsu, S., Milne, A., Aguilar-Islas, A. M., Baker, A. R., Bowie, A. R., 630 Buck, C. S., Gao, Y., Gichuki, S., Hastings, M. G., Hatta, M., Johansen, A. M., Losno, R., Mead, C., Patey, M. D., Swarr, G., Vandermark, A., and Zamora, L. M.: Methods for the sampling and analysis of marine aerosols: results from the 2008 GEOTRACES aerosol intercalibration experiment, *Limnol Oceanogr Methods*, 11, 62–78, <https://doi.org/10.4319/lom.2013.11.62>, 2013.
- Neff, P. D. and Bertler, N. A. N.: Trajectory modeling of modern dust transport to the Southern Ocean 635 and Antarctica, *Journal of Geophysical Research: Atmospheres*, 120, 9303–9322, <https://doi.org/10.1002/2015JD023304>, 2015.
- Nex, P. A. M. and Kinnaird, J. A.: Minerals and Mining in South Africa, 27–35, [https://doi.org/10.1007/978-3-319-94974-1\\_4](https://doi.org/10.1007/978-3-319-94974-1_4), 2019.
- Nundze, S., Ogunlaja, A., Eastwood, K., Thwala, M., and Melariri, P.: Investigation of nanomaterial 640 and hazardous emissions at coal-fired power stations in Mpumalanga, South Africa, *S Afr J Sci*, 120, <https://doi.org/10.17159/sajs.2024/16062>, 2024.
- Paytan, A., Mackey, K. R. M., Chen, Y., Lima, I. D., Doney, S. C., Mahowald, N., Labiosa, R., and Post, A. F.: Toxicity of atmospheric aerosols on marine phytoplankton, *Proceedings of the National Academy of Sciences*, 106, 4601–4605, <https://doi.org/10.1073/pnas.0811486106>, 2009.
- 645 Penven, P., TERNON, J., Noyon, M., Herbette, S., Cambon, G., Comby, C., L’Hégaret, P., Malauene, B. S., Ménesguen, C., Nehama, F., Rauntenbach, G., Rufino, Y., and Sudre, F.: Characterizing the Central Structure of a Mesoscale Eddy-Ring Dipole in the Mozambique Channel From In Situ Observations, *J Geophys Res Oceans*, 130, <https://doi.org/10.1029/2024JC021913>, 2025.
- Perron, M. M. G., Strzelec, M., Gault-Ringold, M., Proemse, B. C., Boyd, P. W., and Bowie, A. R.: 650 Assessment of leaching protocols to determine the solubility of trace metals in aerosols, *Talanta*, 208, <https://doi.org/10.1016/j.talanta.2019.120377>, 2020.
- Piketh, S. J., Swap, R. J., Maenhaut, W., Annegarn, H. J., and Formenti, P.: Chemical evidence of long-range atmospheric transport over southern Africa, *Journal of Geophysical Research: Atmospheres*, 107, <https://doi.org/10.1029/2002JD002056>, 2002.
- 655 Ranaivombola, M., Bègue, N., Vaz Peres, L., Fazel-Rastgar, F., Sivakumar, V., Krysztofiak, G., Berthet, G., Jegou, F., Piketh, S., and Bencherif, H.: Characterization of aerosol optical depth (AOD)

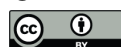

- anomalies in September and October 2022 over Skukuza in South Africa, *Atmos Chem Phys*, 25, 3519–3540, <https://doi.org/10.5194/acp-25-3519-2025>, 2025.
- 660 Rasoazanany, E. O., Andriambololona, R., Andriannarivo, R. R., and Randriamanivo, L. V.: Pollution of the environment by tannery and textile waste waters in the areas of Antananarivo, Madagascar, 15 September 2007.
- Reimann, C. and de Caritat, P.: Distinguishing between natural and anthropogenic sources for elements in the environment: regional geochemical surveys versus enrichment factors, *Science of The Total Environment*, 337, 91–107, <https://doi.org/10.1016/j.scitotenv.2004.06.011>, 2005.
- 665 Richardson, D., Black, A. S., Irving, D., Matear, R. J., Monselesan, D. P., Risbey, J. S., Squire, D. T., and Tozer, C. R.: Global increase in wildfire potential from compound fire weather and drought, *NPJ Clim Atmos Sci*, 5, 23, <https://doi.org/10.1038/s41612-022-00248-4>, 2022.
- Rigden, A., Golden, C., Chan, D., and Huybers, P.: Climate change linked to drought in Southern Madagascar, *NPJ Clim Atmos Sci*, 7, 41, <https://doi.org/10.1038/s41612-024-00583-8>, 2024.
- 670 Schleicher, N. J. and Weiss, D. J.: Identification of atmospheric particulate matter derived from coal and biomass burning and from non-exhaust traffic emissions using zinc isotope signatures, *Environmental Pollution*, 329, 121664, <https://doi.org/10.1016/j.envpol.2023.121664>, 2023.
- Scholes, B., Scholes, M., and Lucas, M.: *Climate Change: Briefings from Southern Africa*, Wits University Press, <https://doi.org/10.18772/22015119186>, 2015.
- 675 Shelley, R. U., Morton, P. L., and Landing, W. M.: Elemental ratios and enrichment factors in aerosols from the US-GEOTRACES North Atlantic transects, *Deep Sea Research Part II: Topical Studies in Oceanography*, 116, 262–272, <https://doi.org/10.1016/j.dsr2.2014.12.005>, 2015.
- Sholkovitz, E. R., Sedwick, P. N., and Church, T. M.: Influence of anthropogenic combustion emissions on the deposition of soluble aerosol iron to the ocean: Empirical estimates for island sites in the North Atlantic, *Geochim Cosmochim Acta*, 73, 3981–4003, <https://doi.org/10.1016/j.gca.2009.04.029>, 2009.
- 680 Sikamo, J.: Copper mining in Zambia - history and future, *J South Afr Inst Min Metall*, 116, 491–496, <https://doi.org/10.17159/2411-9717/2016/v116n6a1>, 2016.
- Stein, A. F., Draxler, R. R., Rolph, G. D., Stunder, B. J. B., Cohen, M. D., and Ngan, F.: NOAA's HYSPLIT Atmospheric Transport and Dispersion Modeling System, *Bull Am Meteorol Soc*, 96, 2059–2077, <https://doi.org/10.1175/BAMS-D-14-00110.1>, 2015.
- 685 Strzelec, M., Proemse, B. C., Barmuta, L. A., Gault-Ringold, M., Desservettaz, M., Boyd, P. W., Perron, M. M. G., Schofield, R., and Bowie, A. R.: Atmospheric Trace Metal Deposition from Natural and Anthropogenic Sources in Western Australia, *Atmosphere (Basel)*, 11, 474, <https://doi.org/10.3390/atmos11050474>, 2020.
- 690 Świetlik, R., Molik, A., Molenda, M., Trojanowska, M., and Siwiec, J.: Chromium(III/VI) speciation in urban aerosol, *Atmos Environ*, 45, 1364–1368, <https://doi.org/10.1016/j.atmosenv.2010.12.001>, 2011.
- Taylor, M. P., Mackay, A. K., Hudson-Edwards, K. A., and Holz, E.: Soil Cd, Cu, Pb and Zn contaminants around Mount Isa city, Queensland, Australia: Potential sources and risks to human health, *Applied Geochemistry*, 25, 841–855, <https://doi.org/10.1016/j.apgeochem.2010.03.003>, 2010.
- 695 Ternon, J.-F., Herbet, S., Penven, P., and Noyon, M.: RESILIENCE cruise, RV Marion Dufresne, <https://doi.org/10.17600/18001917>, 2022.



- Thiagarajan, V., Nah, T., and Xin, X.: Impacts of atmospheric particulate matter deposition on phytoplankton: A review, *Science of The Total Environment*, 950, 175280, <https://doi.org/10.1016/j.scitotenv.2024.175280>, 2024.
- 700 Wagener, T., Guieu, C., Losno, R., Bonnet, S., and Mahowald, N.: Revisiting atmospheric dust export to the Southern Hemisphere ocean: Biogeochemical implications, *Global Biogeochem Cycles*, 22, <https://doi.org/10.1029/2007GB002984>, 2008.
- Wei, T., Dong, Z., Li, F., Kang, S., and Qin, X.: Quantifying the distribution and origins of aerosol zinc across the Northern Hemisphere using stable zinc isotopes: A review, *J Hazard Mater*, 491, 137828, <https://doi.org/10.1016/j.jhazmat.2025.137828>, 2025.
- 705 Westberry, T. K., Behrenfeld, M. J., Shi, Y. R., Yu, H., Remer, L. A., and Bian, H.: Atmospheric nourishment of global ocean ecosystems, *Science* (1979), 380, 515–519, <https://doi.org/10.1126/science.abq5252>, 2023.
- Witt, M., Baker, A., and Jickells, T.: Atmospheric trace metals over the Atlantic and South Indian Oceans: Investigation of metal concentrations and lead isotope ratios in coastal and remote marine aerosols, *Atmos Environ*, 40, 5435–5451, <https://doi.org/10.1016/j.atmosenv.2006.04.041>, 2006.
- Witt, M. L. I., Mather, T. A., Baker, A. R., De Hoog, J. C. M., and Pyle, D. M.: Atmospheric trace metals over the south-west Indian Ocean: Total gaseous mercury, aerosol trace metal concentrations and lead isotope ratios, *Mar Chem*, 121, 2–16, <https://doi.org/10.1016/j.marchem.2010.02.005>, 2010.
- 715 Xu, H. and Weber, T.: Ocean Dust Deposition Rates Constrained in a Data-Assimilation Model of the Marine Aluminum Cycle, *Global Biogeochem Cycles*, 35, <https://doi.org/10.1029/2021GB007049>, 2021.
- Zerizghi, T., Guo, Q., Zhao, C., and Okoli, C. P.: Sulfur, lead, and mercury characteristics in South Africa coals and emissions from the coal-fired power plants, *Environ Earth Sci*, 81, 116, <https://doi.org/10.1007/s12665-021-10046-5>, 2022.
- 720 Zhang, J., Sun, X., Wu, Q., Deng, J., Li, Z., Wen, M., Xu, L., Gu, Y., Han, T., Feng, L., and Duan, L.: Emission characteristics of lead and particulate matter from lead and zinc smelters in China, *J Hazard Mater*, 476, 135224, <https://doi.org/10.1016/j.jhazmat.2024.135224>, 2024.
- Zhou, W., Li, Q. P., and Wu, Z.: Coastal phytoplankton responses to atmospheric deposition during summer, *Limnol Oceanogr*, 66, 1298–1315, <https://doi.org/10.1002/lno.11683>, 2021.
- 725
